# Supplementary material for: Development of Water-in-Oil Emulsions as Delivery Vehicles and Testing with a Natural Antimicrobial Extract
Source: MDPI journal article supplement (doi:10.3390/molecules25092105), 2020-04-30
Supplement: s1 [file s1]

## Supplementary Material for

### **Development of Water-In-Oil Emulsions as Delivery Vehicles and Testing with a Natural Antimicrobial Extract**

Giovana Colucci<sup>1,2</sup>, Arantzazu Santamaria-Echart<sup>1</sup>, Samara C. Silva<sup>1,3</sup>, Isabel P.  
M. Fernandes<sup>1,\*</sup>, Caroline C. Sipoli<sup>2</sup> and Maria F. Barreiro<sup>1,\*</sup>

- <sup>1</sup> Mountain Research Center (CIMO), Polytechnic Institute of Bragança, Santa Apolónia Campus, 5300-253 Bragança, Portugal
- <sup>2</sup> Department of Chemical Engineering, Federal University of Technology – Paraná, Apucarana, Brazil
- <sup>3</sup> Laboratory of Separation and Reaction Engineering – Laboratory of Catalysis and Materials (LSRE/LCM) Department of Chemical Engineering, Faculty of Engineering University of Porto, Rua Dr. Roberto Frias, S/N, 4200-465 Porto, Portugal

\* Corresponding author: e-mail: [ipmf@ipb.pt](mailto:ipmf@ipb.pt)

\* Corresponding author: e-mail: [barreiro@ipb.pt](mailto:barreiro@ipb.pt)

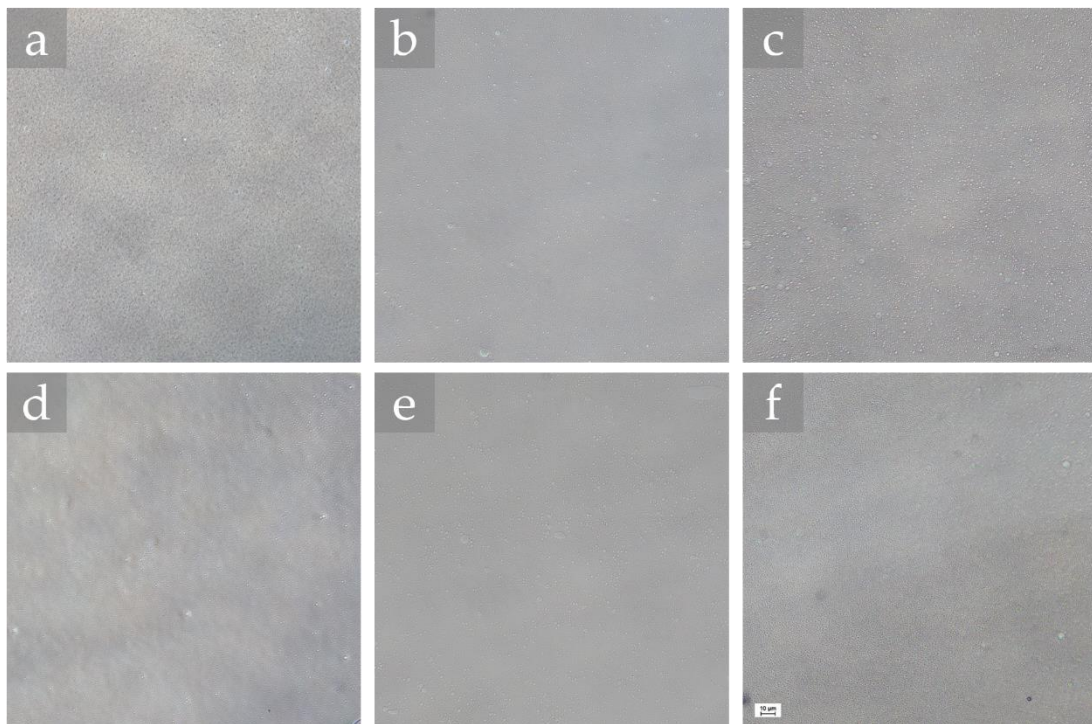

**Figure S1.** Optical microscopy of the produced 40/60 W/O base emulsions. After 21 HPH cycles: (a) S80/T80 54/46; (b) S80/T80 80/20; (c) S85/T80 80/20. After 24 HPH cycles: (d) S80/T80 54/46; (e) S80/T80 80/20; (f) S85/T80 80/20. Bar = 10  $\mu\text{m}$ , 200 $\times$  magnification.

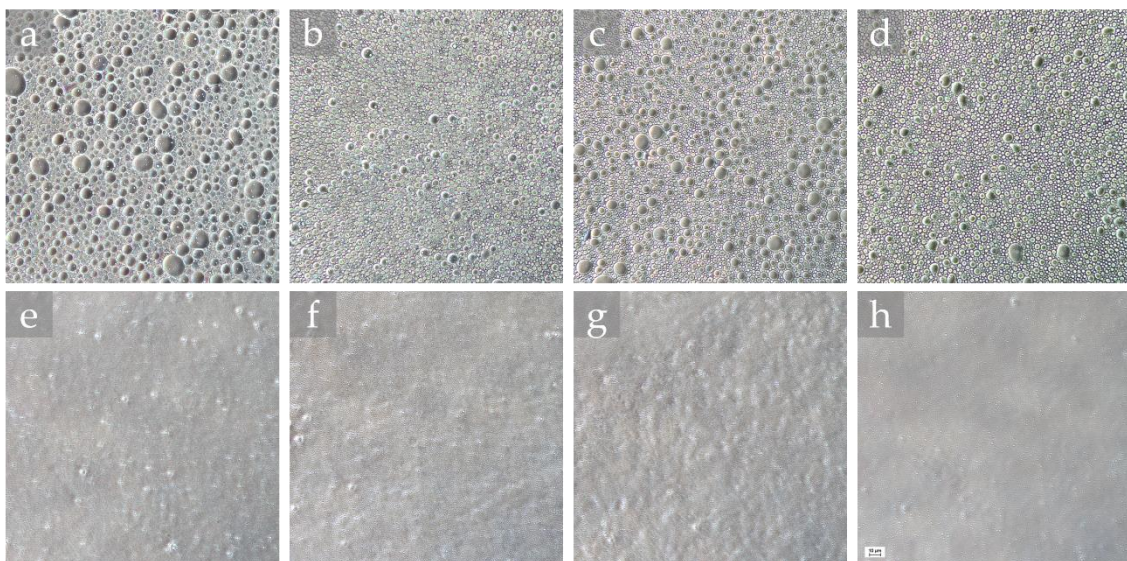

**Figure S2.** Optical microscopy of the produced 40/60 W/O emulsions added with cinnamon extract. Primary emulsions: (a) 1.25%; (b) 2.5%; (c) 3.75%; (d) 5%. After 12 HPH cycles: (e) 1.25%; (f) 2.5%; (g) 3.75%; (h) 5%. Bar = 10  $\mu\text{m}$ , 200 $\times$  magnification.
